# Supplementary material for: Evolution of Antarctic firn air content under three future warming scenarios
Source: Copernicus journal article supplement (doi:10.5194/egusphere-2023-2237), 2023-10-27
Supplement: Supplementary file 1 [file egusphere-2023-2237-supplement.pdf]

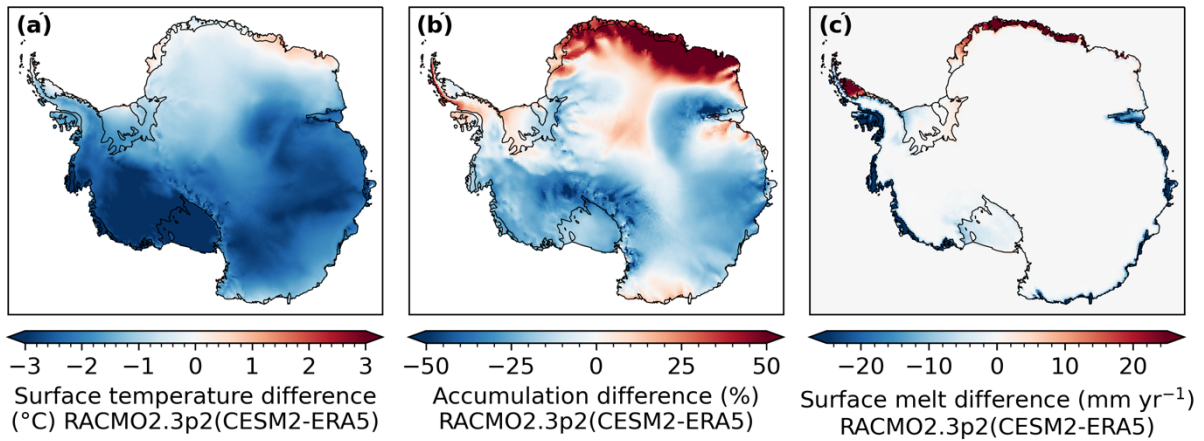

**Figure S1.** Difference in mean annual (a) surface temperature, (b) accumulation and (c) surface melt, over the period 1979-2014 between RACMO2.3p2-CESM2 and RACMO2.3p2-ERA5.

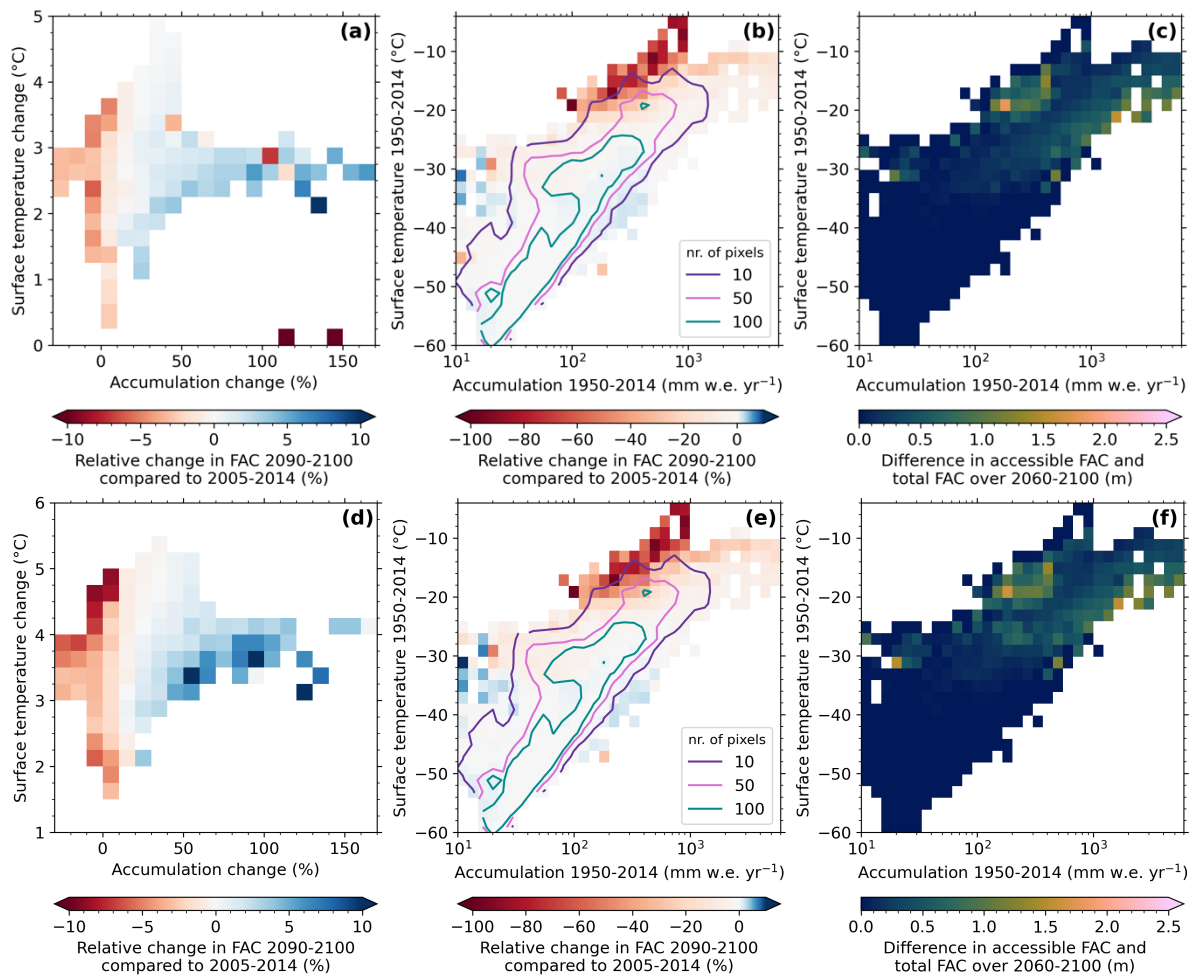

**Figure S2.** Relative change in total FAC by 2090-2100 for SSP1.2-6 (a,b) and SSP2-4.5 (d,e) compared to 2005-2014 (a,d) as a function of temperature change and accumulation change by 2090-2100 compared to 1950-2014 for locations that do not experience melt by the end of the century in SSP5-8.5 and (b,e) as a function of annual average accumulation and temperature (1950-2014) for the entire AIS. Difference between accessible firm air content and total firm air content in 2060-2100 for the entire AIS for SSP1-2.6 (c) and SSP2-4.5 (f) as a function of annual average accumulation and temperature (1950-2014). Contour lines in (b,e) indicate the number of pixels per accumulation/temperature bin. Please note the different scales for decreasing and increasing FAC in panel (b,e).

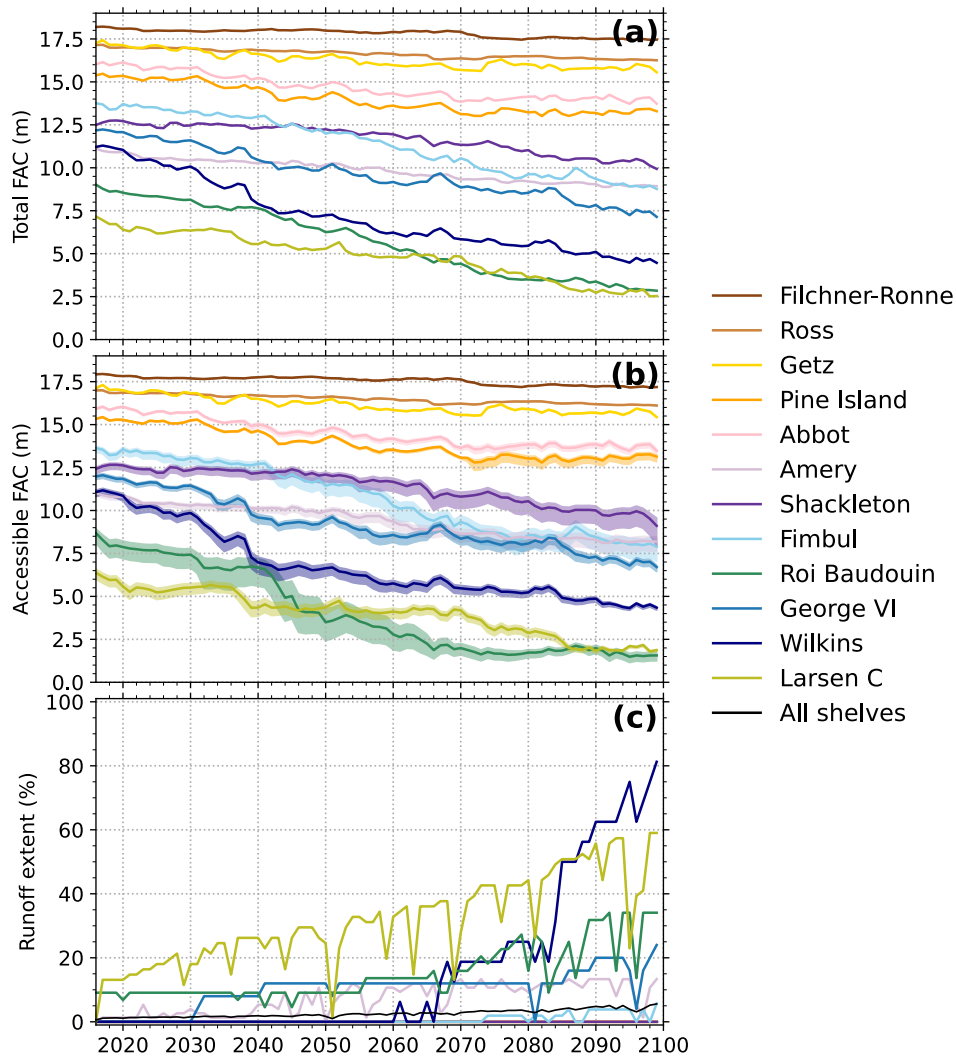

**Figure S3.** Timeseries of **(a)** total firm air content (FAC), **(b)** accessible FAC and **(c)** runoff extent of 12 ice shelves simulated with FDM v1.2AD-C for SSP1-2.6 for the period 2015-2100. The shaded areas indicate the sensitivity to the relation between ice layer thickness and permeability factor shown in Figure 3a.

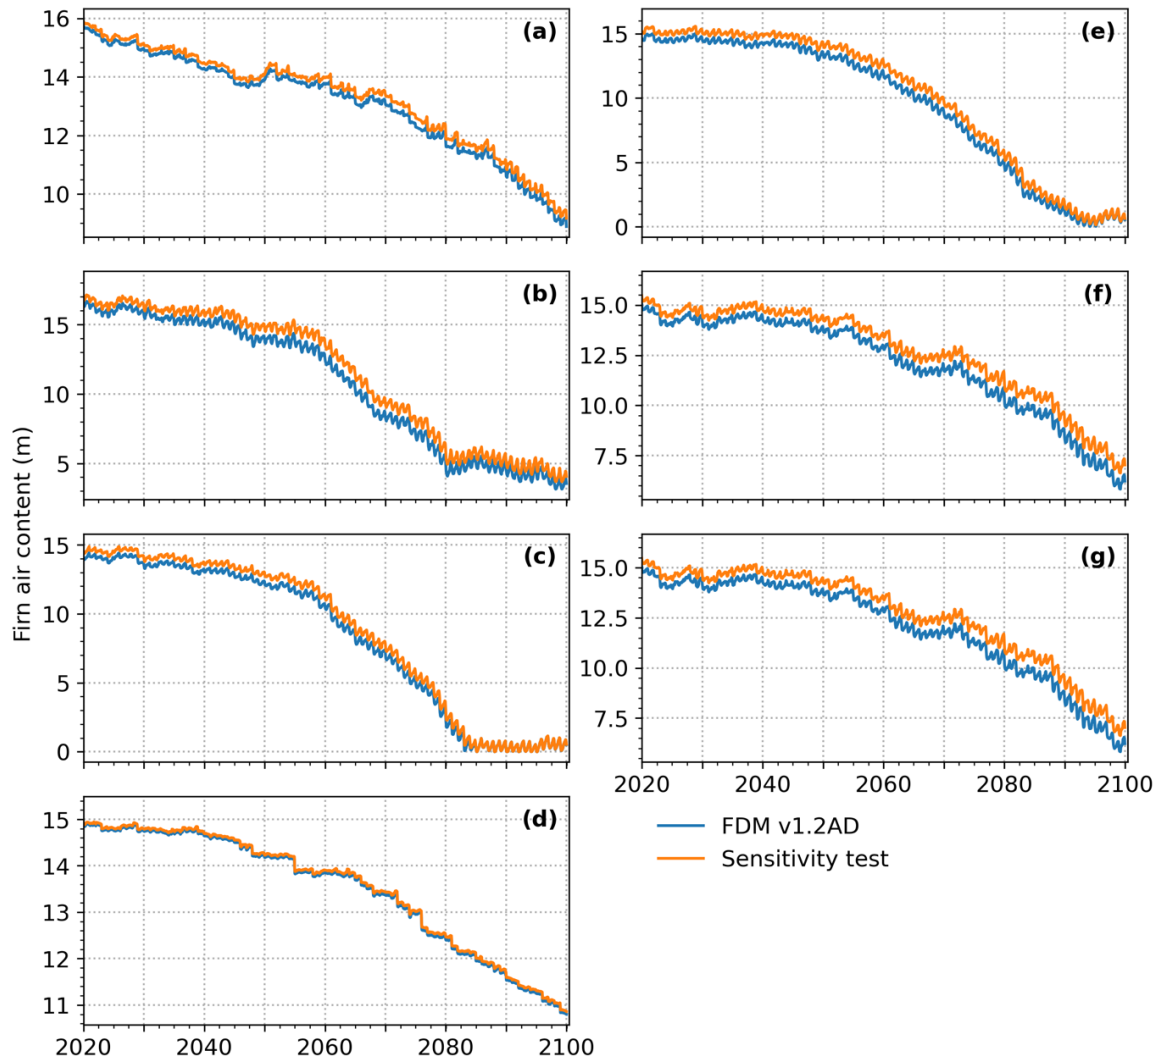

**Figure S4.** Test with different refreezing grain size (0.4 mm) for the locations in Figure 9.
